# Supplementary material for: CRISPR/Cas12a-mediated ultrasensitive and on-site monkeypox viral testing
Source: Royal Society of Chemistry journal article supplement (doi:10.1039/d2ay01998a), 2023-01-01
Supplement: d2ay01998a1.pdf [file d2ay01998a1.pdf]

## Supplementary Material

### CRISPR/Cas12a-mediated ultrasensitive and on-site monkeypox viral testing

Furong Zhao<sup>a, 1</sup>, Pei Wang<sup>a, 1</sup>, Haoxuan Wang<sup>a, 1</sup>, Sirui Liu<sup>a</sup>, Muhammad Sohail<sup>a</sup>,

Xing Zhang<sup>a</sup>, Bingzhi Li<sup>a, \*</sup>, He Huang<sup>a, \*</sup>

<sup>a</sup> *School of Food Science and Pharmaceutical Engineering, Nanjing Normal University,*

*Nanjing, Jiangsu 210023, P.R. China*

<sup>1</sup> Equal contributions:

F.Z, P.W, and H.W. contributed equally to this work.

\* Corresponding Author:

Bingzhi Li (bingzhili@njnu.edu.cn)

He Huang (huangh@njnu.edu.cn)

## 12 **Expression and purification of cas12a**

13 The pMBP-LbCas12a was a gift from Jennifer Doudna (Addgene plasmid # 113431;  
14 <http://n2t.net/addgene:113431>; RRID: Addgene\_113431). The plasmid pMBP-  
15 LbCas12a was transformed into *Escherichia coli* (*E. coli*) Rosetta (DE3) by heat shock.  
16 Totally 1 L aliquot of liquid Terrific-Broth medium with 100 µg/mL ampicillin was  
17 inoculated with 10 mL overnight cultures containing activated bacteria in the Luria-  
18 Bertani medium for the expansion of cultivation. Growth medium plus inoculant was  
19 grown at 220 rpm and 37 °C for 2 h and then at 200 rpm and 20 °C for another 20 min  
20 until the cell density at 600 nm (OD<sub>600</sub>) reached 0.6. Then, 0.5 mM isopropyl β-D-1-  
21 thiogalactopyranoside (IPTG) was added and the cells were cultured at 20 °C for 18 h.  
22 Cells were harvested by centrifugation, resuspended in lysis buffer (50 mM Tris-HCl,  
23 500 mM NaCl, 0.25 mg/mL lysozyme, pH 8.0), and lysed by sonication. Protein  
24 purification included separation via high-affinity Ni-NTA resin (Genescript, China),  
25 MBP-digestion via TEV protease (Beyotime, China), and final acquisition via Dextrin  
26 Beads 6FF (Smart-Lifesciences, China). The purified LbCas12a was quantified by  
27 BCA protein determination reagent and stored at -80 °C.

## 28 **Sensitivity evaluation of PCR-Cas12a-MPXV fluorescence assay**

29 The PCR reaction system was carried out in a 10 µL solution containing 400 nM  
30 forward and reverse primers (F2 and R2), 1 × Taq Master Mix, 1 µL serial 10-fold  
31 dilution (10<sup>10-0</sup> copies/µL) of DNA templates, and ultrapure water. The temperature  
32 procedure of PCR was 95 °C for 3 min, 30 cycles at 95 °C for 30 s, 55 °C for 30 s and  
33 72 °C for 1 min, and final extension at 72 °C for 5 min. Then, the PCR-Cas12a-MPXV

34 fluorescence assay was executed using the same condition as the RAA-Cas12a-MPXV  
35 fluorescence assay, except for PCR products in place of RAA products.

### 36 **Agarose gel electrophoresis**

37 For agarose gel electrophoresis, all of the reaction samples were incubated the same as  
38 the RAA-Cas12a-MPXV fluorescence assay procedures, and a 5  $\mu$ L aliquot of the  
39 reaction solution was subsequently mixed with 1  $\mu$ L of 6  $\times$  loading buffer (Sangon  
40 Biotech, China) containing 1 % GelRed (Biosharp, China). Then, agarose gel  
41 electrophoresis was performed with 3 % agarose gel at a constant voltage of 150 V for  
42 30 min using 1  $\times$  TAE (40 mmol/L Tris-Acetate; 1 mmol/L EDTA; pH 8.0) as the  
43 running buffer, followed by imaging with an automatic digital gelatin image analysis  
44 system (Tanon, China).

45

**Table S1.** DNA sequences used in this study.

| Name        | Sequence (5'→3') *                               |
|-------------|--------------------------------------------------|
| F1.1        | CAGCTCCAACGATACTCCTCCT                           |
| F1.2        | TCTACGACAATGGATGCTGATACACGGC                     |
| F2          | TACAGCTCCAACGATACTCCTCC                          |
| R1          | GACAGGGTTAACACCTTTCCAATAAAT                      |
| R2          | TTCCGTCAATGTCTACACAGGCA                          |
| crRNA1      | UAAUUUCUACUAAGUGUAGAUAC <i>AGUACUCAUUAUAACG</i>  |
| crRNA2      | UAAUUUCUACUAAGUGUAGAU <i>AUGAUGUUAUCCGGUUA</i> A |
| crRNA3      | UAAUUUCUACUAAGUGUAGAU <i>ACCGGAUAACAUCAUCAA</i>  |
| FQ reporter | FAM-TTATTT-BHQ1                                  |
| FB reporter | FAM-TTATTT-biotin                                |

\* The italicized sequences in crRNAs are complementary to partial sequences of the target.

49

**Table S2.** Cost analysis of the RAA-Cas12a-MPXV assay.

| Component                                                                       | Amount   | Cost (\$) | Number of uses | Cost/<br>reaction (\$) |
|---------------------------------------------------------------------------------|----------|-----------|----------------|------------------------|
| RAA nucleic acid<br>amplification kit                                           | 48 tubes | 204.5     | 240            | 1                      |
| Cas12a (Self-expression)                                                        | 1 nmol   | 7.3       | 1000           | 0.0073                 |
| crRNA                                                                           | 1 OD     | 35        | 2630           | 0.0133                 |
| F-Q reporter                                                                    | 1 OD     | 52.2      | 595            | 0.0877                 |
| F-B reporter                                                                    | 1 OD     | 31.7      | 658            | 0.0481                 |
| Lateral flow strip                                                              | 40 tests | 43.8      | 40             | 1.095                  |
| <b>Total cost of RAA-Cas12a-MPXV fluorescence assay per reactions (\$)</b>      |          |           |                | <b>1.1083</b>          |
| <b>Total cost of RAA-Cas12a-MPXV lateral flow strip assay per reaction (\$)</b> |          |           |                | <b>2.1637</b>          |

50

51

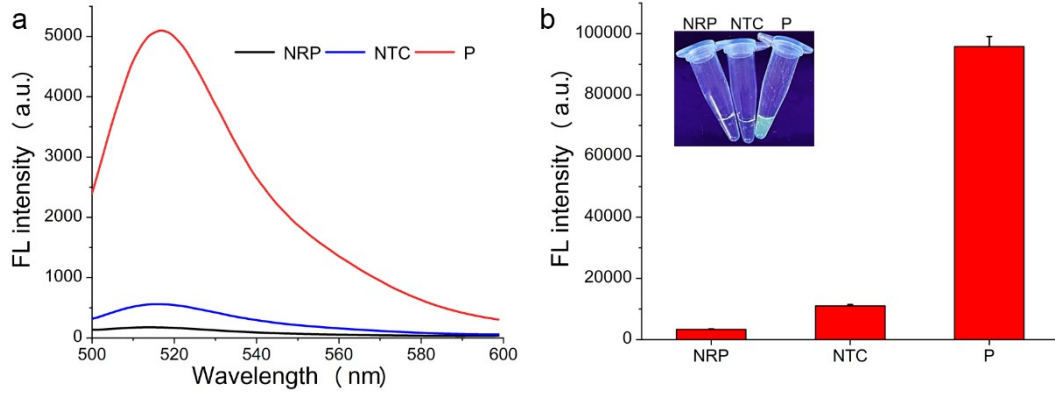

**Fig. S1** Verification of RAA-Cas12a-MPXV testing strategy. **(a)** Fluorescence spectra of feasibility verification. **(b)** Fluorescence intensity of feasibility verification. The inset was photographed by a smartphone under UV light. RAA was carried out under 42 °C for 30 min using F2 and R2, then 1  $\mu$ L RAA product was added to 20  $\mu$ L CRISPR/Cas12a reaction under 37 °C for 40 min (50 nM Cas12a, 50 nM crRNA, 1  $\mu$ M FQ reporter, 1  $\times$  Cas Buffer). NRP, no RAA product; NTC, no template control; P, positive. Error bars represent the standard deviation from three independent experiments.

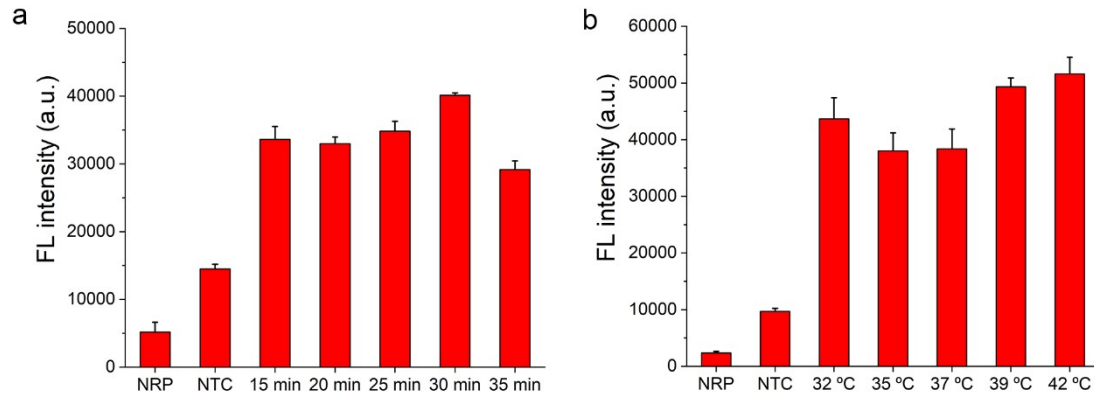

**Fig. S2** Optimization of RAA reaction conditions. **(a)** Fluorescence intensity of RAA-Cas12a-MPXV assay using RAA amplicons under different reaction times (15 min, 20 min, 25 min, 30 min, 35 min). **(b)** Fluorescence intensity of RAA-Cas12a-MPXV assay using RAA amplicons under different reaction temperatures (42 °C, 39 °C, 37 °C, 35 °C, 32 °C). NRP, no RAA product. NTC, no template control. Error bars represent the standard deviation from three independent experiments.

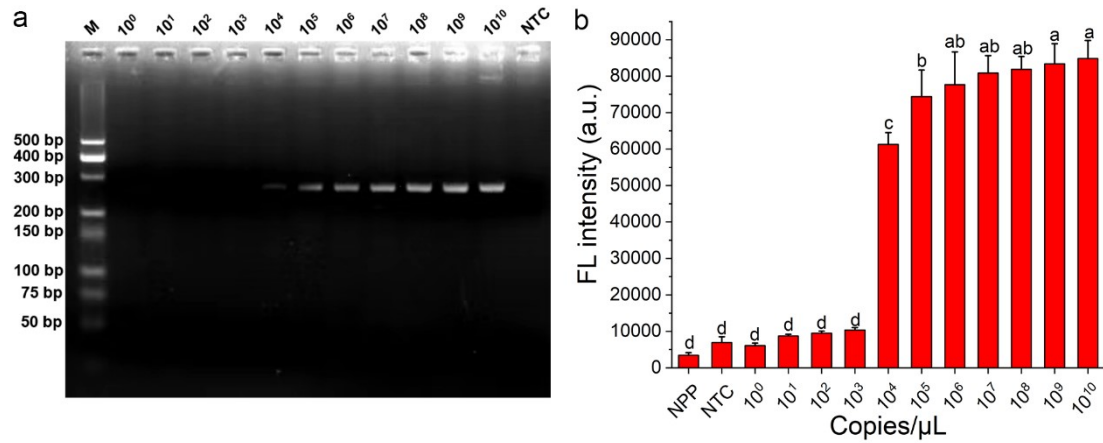

69

70 **Fig. S3** The evaluation of PCR sensitivity. (a) The agarose gel image of PCR products  
 71 using serial 10-fold dilution ( $10^{10-0}$  copies/μL) of DNA templates. M, DNA marker. (b)  
 72 Fluorescence intensity of CRISPR/Cas12a assay with PCR products using serial 10-  
 73 fold dilution ( $10^{10-0}$  copies/μL) of DNA templates. NPP, no PCR product. NTC, no  
 74 template control. Significance analysis results are labeled with different letters above  
 75 the error bars ( $p < 0.05$ ). Error bars represent the standard deviation from three  
 76 independent experiments.
